# Supplementary material
Source: PubMed Central journal article supplement (PMC2889076)
Supplement: 1001554107_pnas.201001554SI.pdf [file 1001554107_pnas.201001554SI.pdf]

# Supporting Information

Pizzato 10.1073/pnas.1001554107

## SI Text

**VDJ Junction Sequence of the *tcr* of JJ6 and JTag Is Identical.** DNA was extracted from JM, JJ6, and CEM cells. A PCR to amplify a TCR gene region encompassing the VDJ junction was performed by using primers 5'-AGTCGGTGACCCAGCTTGGC-3' and 5'-ATCTTGGAAGCACTGCTGTTCGG-3'. A PCR product was only obtained from DNA derived from JTag and JJ6. The DNA sequence of the PCR products was determined and found to be 100% identical in the two cell lines and to the sequence of the Jurkat T cell receptor active  $\alpha$ -chain precursor mRNA (accession no. M12423).

**Effect of gPr80 and Nef on Cell Surface Expression Levels of CD4 and MHC-I.** JTag cells and mouse immortalized fibroblasts MC57 were transfected with vectors encoding HA-gg189 or Nef-HA in combination with a plasmid encoding EGFP. Forty-eight hours after transfection, surface human CD4, and human and mouse

MHC-1 expression levels on cells gated for GFP expression were determined by two-color flow cytometry after staining with mouse anti-CD4, anti-human HLA-ABC, and anti-mouse H-2K<sup>b</sup> (BD Pharmingen) followed by APC-conjugated anti-mouse (Jackson ImmunoResearch).

**Virus Binding Assay.** Virus binding assay for detection of mCAT-1 surface expression levels was performed on JTag cells stably expressing mCAT-1 or control parental JTag cells. Cells were transfected with vectors encoding HA-gg189 or Nef-HA in combination with a plasmid encoding EGFP. Forty-eight hours after transfection, cells were incubated with a MoMLV suspension produced from 293T cells transfected with pNCA. at 4 °C for 60 min. Virus-cell complexes were stained with anti-RLV SU (Quality Biotech) followed by APC-conjugated anti-goat, and cells gated for GFP expression were analyzed.

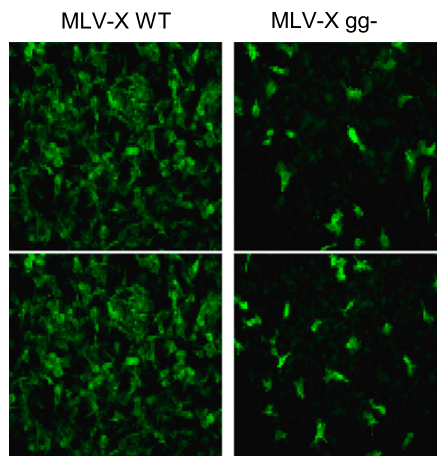

**Fig. S1.** gPr80 is required for optimal infectivity of MLV. MLV-X restricted to a single cycle of replication produced from JTag cells and normalized for RT activity was inoculated onto HT10180 cells. The figure shows immunofluorescence staining of infected target cells performed 48 h after infection by using an anti-RLV P30 antibody followed by Alexa-488 conjugated anti-goat antibodies.

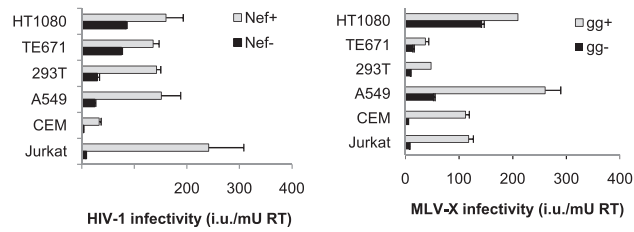

**Fig. S2.** Absolute infectivity of HIV-1 and MLV-X derived from different producer cell types. Results expressed as percentage of WT in Fig. 5B are here shown as absolute infectivity values.

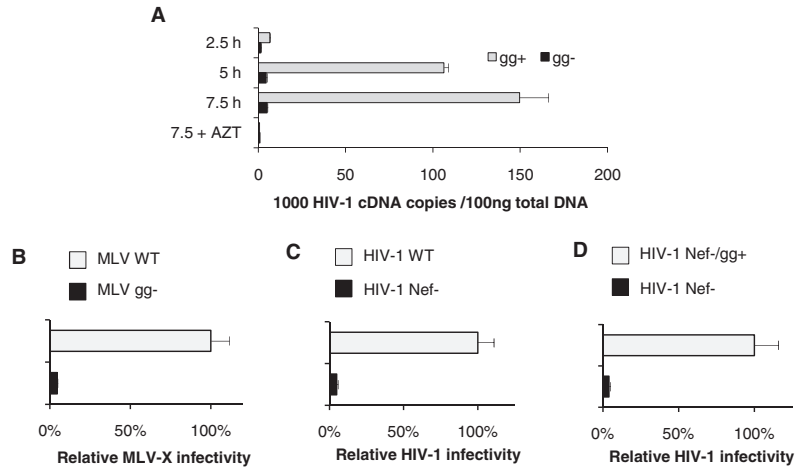

**Fig. S3.** gPr80 affects progression of HIV-1 reverse transcription. (A) gPr80 affects the steady-state levels of Nef-negative HIV-1 full-length viral cDNA, resembling the effect of Nef (Fig. 5C). (B–D) Relative infectivity of HIV-1 and MLV-X used in Fig. 5C. Viruses produced in JTAG cells and used in Fig. 5C and in A were serially diluted and inoculated onto HT1080 (B) or NP2-CD4/CXCR4 (C and D) respectively. Infected target cells were stained with anti RLV P30 anti HIV-1 p55/p2 and followed by Alexa-488 conjugated antibodies and quantified by scoring clusters of infected cells by fluorescence microscopy.



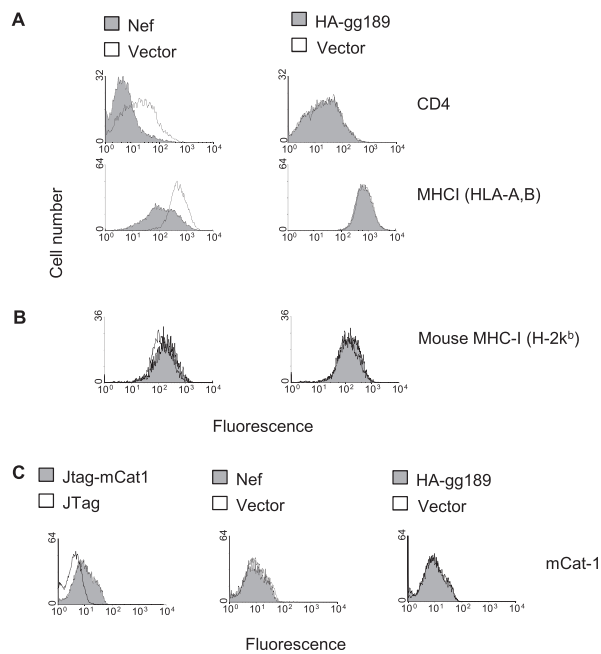

**Fig. S6.** Unlike Nef, glycoprotein does not down-regulate retrovirus receptors and MHC-I. (A) gPr80 does not affect cell surface expression levels of human CD4 and MHC-I in JTag cells. (B) Neither gPr80 nor Nef affect surface levels of mouse MHC-I (H-2k<sup>b</sup>) in MC57 mouse fibroblasts. Of note, the failure of HIV-1 Nef to down-regulate MHC-I in mouse cells has been reported (1) (C) Virus binding assay for detection of cell surface mCat-1 on JTag/mCat-1 cells (*SI Text*). (Left) The presence of mCat-1 on JTag cells promotes virus binding detected by using an anti-SU antibody. (Center and Right) Nef and gPr80 expression in JTag/mCat1 do not affect efficiency of SU binding and, therefore, of mCat-1 surface expression level.

1. Fleis R, Filzen T, Collins KL (2002) Species-specific effects of HIV-1 Nef-mediated MHC-I downmodulation. *Virology* 303:120–129.

**Table S1. Properties and origin of the cell lines used in Fig. 1**

| Cell line    | Origin                       | Comments                                                      | Source                                        |
|--------------|------------------------------|---------------------------------------------------------------|-----------------------------------------------|
| C8166        | Human T cell leukemia        | Parental                                                      | Imperial College London                       |
| CEM          | Acute lymphoblastic leukemia | Parental                                                      | University College London                     |
| CEM/A3.01    | Acute lymphoblastic leukemia | Derivative of CEM, highly permissive to HIV-1 replication     | NIH AIDS Research & Reference Reagent Program |
| CEM/A3.01-F7 | Acute lymphoblastic leukemia | Derivative of CEM/A3.01, ectopic expression of CCR5           | National Biological Standards Board           |
| CEM-SS       | Acute lymphoblastic leukemia | Derivative of CEM, highly susceptible for fusion with HIV     | NIH AIDS Research & Reference Reagent Program |
| DG75/HAD     | Burkitt's lymphoma           | Parental, EBV-negative                                        | Medical College of Wisconsin                  |
| DG75/UW      | Burkitt's lymphoma           | Parental, EBV-negative                                        | Hadassah Medical Center                       |
| H9           | Human T cell lymphoma        | Derivative of HUT-78, highly permissive for HIV-1 replication | Imperial College London                       |
| HBS-2        | Acute lymphoblastic leukemia | parental, CD4-negative                                        | NIH AIDS Research & Reference Reagent Program |
| Jurkat D1.1  | Acute T cell leukemia        | Derivative of JM, CD4-negative                                | American Type Culture Collection              |
| Jurkat E6.1  | Acute T cell leukemia        | Derivative of JM, high producers of IL-2                      | American Type Culture Collection              |
| Jurkat J6    | Acute T cell leukemia        | Derivative of JM, high expression of CD3                      | London Research Institute                     |
| Jurkat JM    | Acute T cell leukemia        | Parental                                                      | NIH AIDS Research & Reference Reagent Program |
| Jurkat TAg   | Acute T cell leukemia        | Derivative of JM, express SV40 Large T antigen                | Dana-Farber Cancer Institute                  |
| RAJI         | Burkitt's lymphoma           | Parental, EBV-positive                                        | Imperial College London                       |
| Ramos        | Burkitt's lymphoma           | Parental, EBV-negative                                        | Imperial College London                       |
| SupT1        | Lymphoblastic leukemia       | Parental                                                      | Imperial College London                       |
| U937         | Histiocytic lymphoma         | Parental                                                      | Imperial College London                       |
